# Supplementary material for: Accelerated gravity testing of aquitard core permeability and implications at formation and regional scale
Source: Copernicus journal article supplement (doi:10.5194/hess-20-39-2016), 2016-01-15
Supplement: Supplementary file 1 [file hess-20-39-2016-supplement.pdf]

Supplement of Hydrol. Earth Syst. Sci., 20, 39–54, 2016  
<http://www.hydrol-earth-syst-sci.net/20/39/2016/>  
doi:10.5194/hess-20-39-2016-supplement  
© Author(s) 2016. CC Attribution 3.0 License.

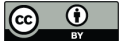

Hydrology and  
Earth System  
Sciences

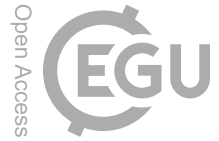

*Supplement of*

## **Accelerated gravity testing of aquitard core permeability and implications at formation and regional scale**

**W. A. Timms et al.**

*Correspondence to:* W. A. Timms ([w.timms@unsw.edu.au](mailto:w.timms@unsw.edu.au))

The copyright of individual parts of the supplement might differ from the CC-BY 3.0 licence.

1 **S1** NCGRT Broadbent centrifuge permeameter system

2 The centrifuge in this study (Fig. S1) is a Broadbent GT-18 Modular Geotechnical Centrifuge  
3 (a 22kW motor drives a variable speed of 10 to 875 *RPM*) on which two modules can be  
4 fitted: either a centrifuge permeameter GMP GT2/0.65F or a geotechnical beam GMB  
5 GT6/0.75F (Broadbent, 2011; Timms et al., 2014). The geotechnical beam module is not  
6 discussed further in this study. The centrifuge permeameter (CP) module was designed  
7 specifically for groundwater research while the base centrifuge and geotechnical beam  
8 module are standard. Table 1 describes the specifications and performance details of the  
9 centrifuge system designed by Broadbent and the University of New South Wales, Australia.  
10 By contrast, smaller diameter centrifuge permeameter modules were designed for a similar  
11 centrifuge at the University of Texas are of smaller diameter (McCartney, 2007).

12 The centrifuge permeameter (CP) system, which includes advanced influent and effluent  
13 systems (Supplement S3), enables relatively rapid and repeatable testing of large drill core  
14 ('H' or 'C' core diameter 65 to 101 mm, length 30-200 mm)\_with realistic stress conditions.  
15 A low flow rotary union with a capacity of 0.1 to 100 mL minute<sup>-1</sup> connects the influent lines  
16 A and B to permeameters 1 and 2 without cross flow between the two influent lines. Unlike  
17 UFA centrifuge systems this flow union is not sealed, so the maximum head of fluid within  
18 this centrifuge is the radial distance from the rotary union to the top of the sample (a distance  
19 of approximately 550 mm assuming a 100 mm length of core).

20 Each CP has a maximum sample capacity weight of 4.7 kg. In this system, at maximum  
21 centrifuge RPM, a centrifugal force of 556g applies at the base of the core samples at a radius  
22 of 0.65 m from the centre of rotation. The relatively large CP module allows on-board  
23 instrumentation and real-time monitoring of a range of parameters within a pair of  
24 permeameter bodies balanced at either end of the rotating beam. Since a maximum *g*-level of  
25 471 applies at the centre of the sample weight, the rating of this module is 2.2 *g*-ton  
26 (471×4.7/1000), and is a relatively small geotechnical centrifuge module (Zornberg and  
27 McCartney, 2010). The total weight of each of the pair of centrifuge permeameters when  
28 empty is 12.4 kg plus an allowance of 1.0 kg of effluent in the reservoir. Routine testing of  
29 low permeability porous media is possible with a large cross-sectional flow area (100 mm  
30 diameter), influent pumps with variable speeds capable of low flow, and effluent detection  
31 systems. Weighting discs to simulate stresses on cores of up to ~2 MPa (at maximum RPM)  
32 have also been developed for consolidated samples requiring testing at higher stress.

1 **S2 Fluid pressure, head and gradient in centrifuge permeameters**

2 Concepts for fluid flow at accelerated gravity are illustrated in Fig. S2 and Fig. S3. The  
3 hydrostatic fluid pressure (Eq. 1), measured at a radial position within the core sample,  
4 increases with distance from the axis of rotation, continues into a pressured reservoir  
5 boundary or decreasing to zero at a free drainage boundary. By contrast, the centrifuge  
6 inertial (elevation) head decreases with increasing distance from the axis of rotation, as  
7 shown by Nimmo and Mello (1991) and McCartney (2007). It follows that the direction of  
8 fluid flow is outwards, in the opposite direction to the axis of rotation.

9 Calculated pore fluid pressure and total stress are shown in Fig. S2 for a 50 mm length core at  
10 40g for the Broadbent CP module, based on Eq. (1) and Eq. (2), in 0.005 m increments of  
11 radius. The effective stress, the difference between the total stress and pore fluid pressures, is  
12 evidently highest towards the base of the core, before the effects of a free drainage base (zero  
13 pressure) occur within the core. At 40g, the total stress at the base of the core is 40 kPa, or 34  
14 kPa plus 6 kPa of stress at the top of the core assuming a fluid head of 20 mm ponded on the  
15 top of a 50 mm length of core. At 80g, the total stress at the base of the core is 74 kPa. This is  
16 significantly less than the maximum in situ stress for core samples listed in Table 3,  
17 calculated using Eq. (3), as intended during test design (Section 4.2). Centrifuge  $K$  values  
18 reported in this study could therefore be biased on the high side if total stress at the base of  
19 the core under steady state conditions were the only consideration.

20 The gradients that drive flow are depicted in Fig. S3, with the most significant driving force  
21 being due to centrifugal acceleration. The numerical analysis of fluid pressures that develop  
22 during flow and transition to new  $g$ -levels is beyond the scope of the current study.

23 Figure S3 shows the water head gradient of 0.4 (at 1g) compared with the centrifuge  
24 “elevation head” gradient or centrifuge inertial force that drives fluid flow within the  
25 centrifuge for both the Broadbent CP module and the UFA system at 40g. Thus, the  
26 Broadbent CP module achieves a more constant  $g$ -level over the length of a 50 mm core than  
27 is possible with the smaller UFA system. The centrifuge elevation gradient driving flow is  
28 significantly greater than the water head gradient that would occur at 1g, and is more uniform  
29 in the Broadbent CP module (37g to 40g) compared with the UFA system (23g to 40g), being  
30 a variation of 7% and 41% respectively.

1 Non-linearity in pore pressure distribution is considered to be insignificant where the ratio of  
2 radius and sample size ( $r/L$ ) is large (Nakajima and Stadler, 2006). In their study, the  $r/L$  ratio  
3 was 8 (2.0/0.25). By this criteria it is noted that for the examples given here, the  $r/L$  ratio of  
4 130 (0.65/0.005) in the Broadbent CP module is more favourable than for the UFA setup with  
5 the  $r/L$  ratio of 22 (0.11/0.005). Timms et al. (2003) noted that accurate scaling of physical  
6 factors (eg length, time) in the UFA centrifuge was limited by differing acceleration and  
7 stress experienced at the top and base of the core. A larger radius centrifuge operated at lower  
8 speeds minimises stress gradients within the core, thus minimising the possibility of variable  
9 stresses affecting the structure of the core sample.

### 10 **S3** Centrifuge permeameter flow systems and instrumentation

11 In addition to the Broadbent CP module, some unique systems were developed as part of this  
12 study. Influent was fed from a pair of burettes located next to the centrifuge via a pair of  
13 custom designed low voltage peristaltic pumps mounted either on the centrifuge beam, or  
14 outside the centrifuge and through the low flow rotary union described in Supplement S4. The  
15 peristaltic pumps can be operated either as zero/maximum flow to a set level, or at a variable  
16 flow rate of 0.001-150 mL hour<sup>-1</sup>. Manual burette measurements to a resolution of 0.1 mL  
17 were used to verify the pump rates.

18 A personal computer (PC) with LABVIEW software was used for data logging and control of  
19 the influent pumping system, which was originally connected via an Ethernet Optic Rotary  
20 Joint (FORJ) and subsequently replaced with a wireless system. A new data acquisition  
21 module (DAS) was designed and constructed with 7 data channels per module, including  
22 influent level monitoring, pressure/load and temperature. A wireless hub was fixed on the  
23 centrifuge beam for data transfer from the acquisition modules to a wireless modem outside  
24 the centrifuge. Low voltage power to the DAS is transferred to the centrifuge beam via slip  
25 rings described by Broadbent (2011).

26 Each permeameter assembly includes a custom designed reservoir insert (see Fig. S4a and b)  
27 and employs a pair of custom designed carbon fibre rod electrical conductivity (EC)  
28 electrodes to detect the influent reservoir head to an accuracy of 0.1 mm. The head of influent  
29 on the core is typically set to maintain a constant head of influent 20 to 100 mm above the  
30 core sample by selection of electrodes of specific length and is therefore maintained at a  
31 constant head during  $K$  testing. The electrodes protrude through a pluviator cap into the

1 influent reservoir, and when the reservoir is depleted a decrease in EC is detected and  
2 transmitted back to the PC. The corresponding peristaltic pump is then switched on to  
3 automatically pump fluid back into the reservoir. Carbon fibre rod (1 mm diameter) was  
4 selected as the electrode material due to its high tensile strength, low mass, high electrical  
5 conductivity and its resistance to corrosion.

6 The permeameter is also equipped with effluent reservoir capacity which is connected to the  
7 sample via a drainage plate. In order to allow homogenous flow of fluid from the sample  
8 surface into the effluent reservoir the drainage plate is lined with one 1 mm thick A14 Bidim  
9 geofabric filter (110 micron, and permeability of  $33 \text{ m s}^{-1}$ ; Geofabrics, 2009) and one  
10 Whatman 5 qualitative filter paper. The hydraulic conductivity of the drainage plate through a  
11 drainage hole of 2 mm diameter was independently measured to ensure there was no  
12 impedance to free drainage. The average permeability >10 tests of the drainage plate was  $\sim 10^5$   
13  $\text{m s}^{-1}$  (unpublished data), which is typically a factor of 1,000 higher than low permeability  
14 core samples.

15 Effluent is extracted via a syringe or peristaltic pump through a 'U' shaped tube that connects  
16 to the base of the effluent reservoir (Figure S3b). The concave dish base of the effluent  
17 reservoir has a volume of  $\sim 30 \text{ mL}$ . This system, designed by UNSW specifically for these  
18 studies, enables samples to be extracted without the need for the permeameters to be taken off  
19 the beam, thereby alleviating safety risks in lifting heavy permeameters, and reduces the stop  
20 time required for a sampling event during centrifuge flight to less than 5 minutes.

21 An air vent, located at the top of the reservoir near the lower end of the drainage plate,  
22 connects the reservoir to the outside of the permeameter, thereby maintaining a zero pressure  
23 outflow boundary. The free drainage boundary condition is different from other centrifuge  
24 flow setups and is important for subsequent interpretation of flow processes during.

#### 25 **S4** Limits and uncertainties of centrifuge permeameter testing

26 *K* values measured in this study are within the range of applicability of Darcy's Law for  
27 laminar flow at accelerated gravity. Flow of fluid through porous media at accelerated gravity  
28 was found by Nimmo et al. (1987) to follow Darcy's law for accelerations below 1,600g. The  
29 low end of *K* values that have been measured for geological specimens in the laboratory is  $10^6$   
30  $\text{ms}^{-1}$  in the UFA centrifuge (Conca and Wright, 1998). At accelerated gravity, steady state

1 flow equilibrium is achieved in a time of hours and days, and in situ stresses can be applied to  
2 drill core from approximately <100 m depth or a total stress of approximately 1 MPa in the  
3 Broadbent CP system (without weighting discs).

4 Hydraulic conductivity data from centrifuge permeameter experiments include a component  
5 of measurement error. The quantified components of the measurement error are: limit of  
6 reading for time  $\pm 0.5$  s; limit of reading for permeameter (total mass) balance  $\pm 0.5$  g; limit  
7 of reading for high precision (outflow mass) balance  $\pm 0.1$  g; limit of reading for influent  
8 control burette  $\pm 0.1$  mL; accuracy of automatic influent control system  $\pm 0.1$  mL; accuracy  
9 of influent fluid level monitoring system  $\pm 0.2$  mm; fluid held by surface tension in effluent  
10 reservoir and on reservoir base plate  $< \pm 1.0$  mL; evaporation from permeameter chambers  $<$   
11  $0.3$  mm/d ( $< 2.2$  mL day<sup>-1</sup> at 875 RPM).

12 Sidewall leakage between the core-sample and wall of the permeameter, and any resin that is  
13 required to set the core sample for testing has been quantified and is below the hydraulic  
14 conductivity detection limit. The current detection limit of the centrifuge permeameter ranges  
15 from  $3 \times 10^{-11}$  to  $1 \times 10^{-12}$  ms<sup>-1</sup>. For the semi-consolidated clay core the detection limit, based on  
16 low flow measurement was  $1 \times 10^{-12}$  ms<sup>-1</sup>. For the experimental procedure followed for this  
17 study the above volumetric errors translate to an uncertainty in the measurement of  $K$  that is  
18 typically better than  $\pm 15\%$ .

19 In addition to sidewall leakage, preferential flow can occur through fractures, i.e. features  
20 within the core that are either natural or introduced. However, uncertainty due to preferential  
21 flow is not a major uncertainty in the centrifuge permeameter because preferential flow is  
22 amplified and readily identified. Flow volumes 10 to 80 times greater occur at 10g to 80g  
23 applied in this study, meaning core seal or fracture failures are readily identified from  
24 anomalous flow rates and effluent volumes.

25 Another possible uncertainty with centrifuge permeameter testing is the consolidation and  
26 saturation status of core that may affect permeability results. Underestimation of in situ  
27 permeability can be attributed to core that is not fully saturated, or to applied stresses that  
28 cause consolidation of the core. A bias to high permeability results could occur where the  
29 core matrix is unloaded and tested at stresses lower than in situ stresses.

30

1 **S5** Moisture data from cores, measured on the drill site.

| BF site      |                  | NR site      |                  | CL site      |                  |
|--------------|------------------|--------------|------------------|--------------|------------------|
| Depth (m BG) | Moisture (% wt.) | Depth (m BG) | Moisture (% wt.) | Depth (m BG) | Moisture (% wt.) |
| 0-1.5        | 23.5             | 0-1.5        | 26.1             | 1.32-1.38    | 48.9             |
| 1.5-3.0      | 24.6             | 1.5-3        | 27.3             | 2.48-2.88    | 56.9             |
| 3-4.5        | 23.4             | 3-4.5        | 38.1             | 4.33-4.38    | 42.6             |
| 4.5-6        | 22.2             | 4.5-6.0      | 31.7             | 5.83-5.88    | 35.8             |
| 6.0-7.5      | 21.2             | 6-6.5        | 24.0             | 7.33-7.38    | 32.3             |
| 7.5-9.0      | 25.9             | 7.5-8.65     | 25.7             | 10.33-10.38  | 40.9             |
| 9-10.5       | 20.5             | 8.65-10.35   | 28.6             | 11.83-11.88  | 41.1             |
| 10.5-12      | 25.0             | 8.65-10.35   | 27.4             | 13.33-13.38  | 30.2             |
| 12-13.5      | 27.5             | 10.35-12     | 26.3             | 14.83-14.88  | 49.7             |
| 13.5-15      | 24.1             | 12-13.5      | 20.9             | 16.30-16.50  | 48.4             |
| 15-16.5      | 35.9             | 13.5-15      | 29.5             | 17.38-17.88  | 44.8             |
| 16.5-18      | 28.9             | 15-16.5      | 20.5             | 19.33-19.38  | 48.6             |
| 18-19.5      | 21.4             | 16.5-18      | 37.6             | 20.83-20.88  | 45.2             |
| 19.5-21      | 26.5             | 18-19.5      | 26.0             | 22.33-22.38  | 43.5             |
| 21-22.5      | 18.6             | 19.5-21      | 23.5             | 23.83-23.88  | 53.1             |
| 22.5-24      | 27.8             | 21-22.5      | 24.8             | 26.83-26.88  | 38.2             |
| 24-25.5      | 23.3             | 22.5-24      | 25.3             | 28.33-28.38  | 33.9             |
| 26.45-27.3   | 27.3             | 24-25.5      | 26.1             | 29.83-29.88  | 34.6             |
| 27.3-28.8    | 25.0             | 25.5-27      | 25.8             | 31.33-31.38  | 25.7             |
| 28.8-30.3    | 21.9             | 27-28.5      | 27.1             |              |                  |
| 30.3-31.8    | 23.9             | 28.5-30      | 27.5             |              |                  |
| 31.8-33.3    | 25.4             | 30-31.5      | 28.3             |              |                  |
| 34.68-34.78  | 20.4             | 31.5-33      | 29.2             |              |                  |
| 33.3-34.8    | 21.7             | 33-34.5      | 28.9             |              |                  |
| 34.8-35.4    | 17.5             | 34.5-36      | 27.1             |              |                  |

|           |      |         |      |
|-----------|------|---------|------|
| 35.4-36.3 | 16.5 | 36-37.5 | 26.6 |
| 36.3-37.8 | 21.5 | 37.5-39 | 28.0 |
| 37.8-39.3 | 20.6 | 39-40.5 | 28.6 |
| 39.3-40.5 | 23.1 | 40.5-42 | 25.9 |
| <hr/>     |      | <hr/>   |      |
| Average   | 23.6 | Average | 27.3 |
| <hr/>     |      | <hr/>   |      |
|           |      | Average | 41.8 |

1 m BG is metres below ground, % wt. is percent weight

## 2 References

- 3 Broadbent: Operating Manual for Modular Geotechnical Centrifuge with GT2/0.65  
4 Permeameter And GT6/0.75 Beam Environments, Broadbent and Sons Ltd., Huddersfield,  
5 UK, 2011.
- 6 Conca, J.L., and Wright, J.: The UFA method for rapid, direct measurements of unsaturated  
7 transport properties in soil, sediment and rock, *Aust. J. Soil Res.* 36, 1-25, 1998.
- 8 Geofabrics: Bidim® Technical data sheet – nonwoven polyester geotextile. M018 02 09.  
9 Geofabrics Australasia Pty Ltd, 2009.
- 10 McCartney, J.S.: Determination of the Hydraulic Characteristics of Unsaturated Soils using a  
11 Centrifuge Permeameter. PhD Thesis, The University of Texas at Austin, Faculty of the  
12 Graduate School, 2007.
- 13 Nakajima H., and Stadler, A.T.: Centrifuge modeling of one-step outflow tests for unsaturated  
14 parameter estimations. *Hydrol. Earth Syst. Sci.*, 10, 715–729, 2006.
- 15 Nimmo, J.R., and K.A. Mello, K.A.: Centrifugal techniques for measuring saturated hydraulic  
16 conductivity. *Water Resour. Res.* 27 (6), 1263–1269, 1991.
- 17 Nimmo, J.R., Rubin, J., and Hammermeister, D.P.: Unsaturated flow in a centrifugal field:  
18 measurement of hydraulic conductivity and testing of Darcy’s Law. *Water Resour. Res.*,  
19 23(1):124-134, 1987.
- 20 Timms, W.A. and Hendry, M.J.: Application of centrifuge modelling to assess long term  
21 brine migration in thick clay till, Saskatchewan, Canada., Australian Institute of Mining and  
22 Metallurgy Conference “Water in Mining”, Brisbane, October 13-15, pp. 363-372, 2003.
- 23 Timms, W., Whelan, M., Acworth, I., McGeeney, D., Bouzalakos, S., Crane, R., McCartney,  
24 J. and Hartland, A.: A novel centrifuge permeameter to characterize flow through low  
25 permeability strata. In proceedings of International Congress on Physical Modelling in  
26 Geotechnics (ICPMG), Perth, Balkema, 14-17 January, 2014.



1 Zornberg, J.G., and McCartney, J.S.: Centrifuge Permeameter for Unsaturated Soils. I:  
2 Theoretical Basis and Experimental Developments. J. Geotechnical and Geoenvironmental  
3 Engineering, 136, 8, 1051-1063, 2010.

4

1 **Fig. S1.** Schematic diagram of the NCGRT geotechnical centrifuge and permeameter module in  
2 cross-section (Broadbent, 2011).

3

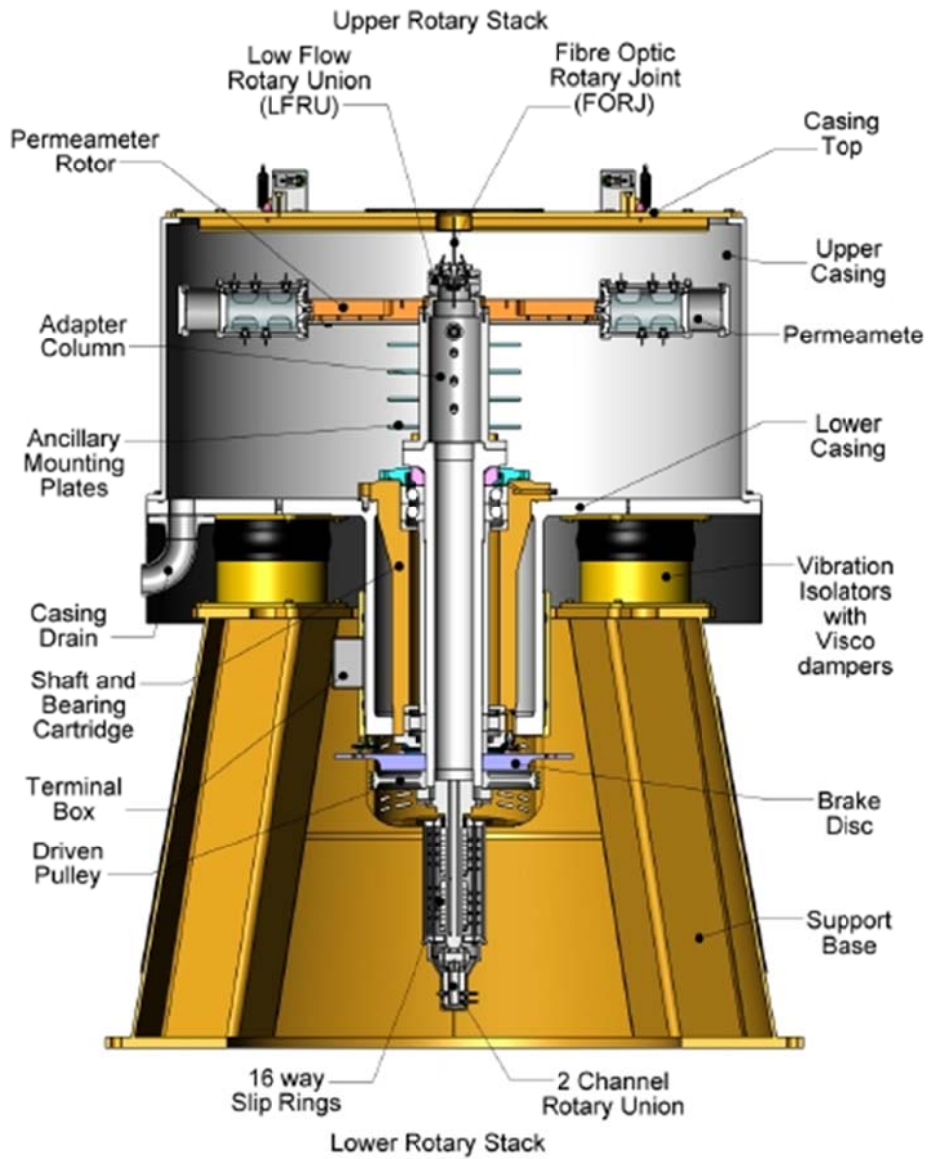

4

5

1 **Fig. S2.** Fluid head pressure (hydrostatic), total stress and effective stress (difference between total  
2 stress and effective stress) at 40g in this study.

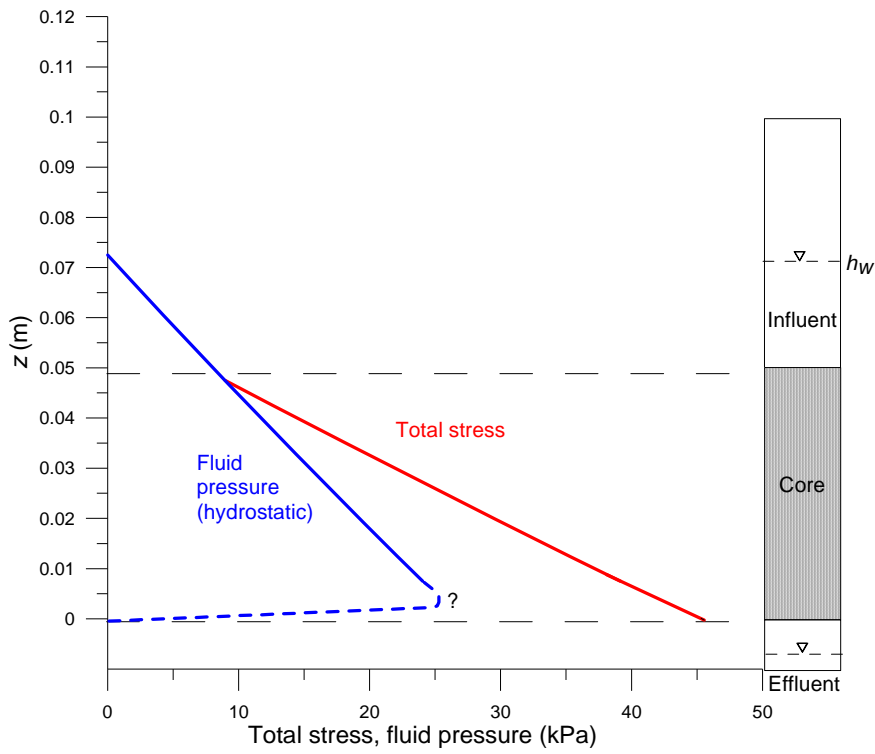

3  
4  
5

1 **Fig. S3.** (a) Conceptual relationship between hydrostatic fluid pressure, centrifuge inertial (elevation)  
 2 head for a core in a centrifuge permeameter as a function of  $z$  (Figure 1). The direction of centrifugal  
 3 acceleration and fluid flow is indicated by the arrow  $Ng$ . Alternative drainage boundary condition  
 4 (DBC) and pressure boundary condition (PBC) are indicated at the base of the core sample. (b) Fluid  
 5 head gradient at  $1g$  and centrifuge inertial head gradients for the UFA and Broadbent (CP module)  
 6 centrifuges at  $40g$

(a)

(b)

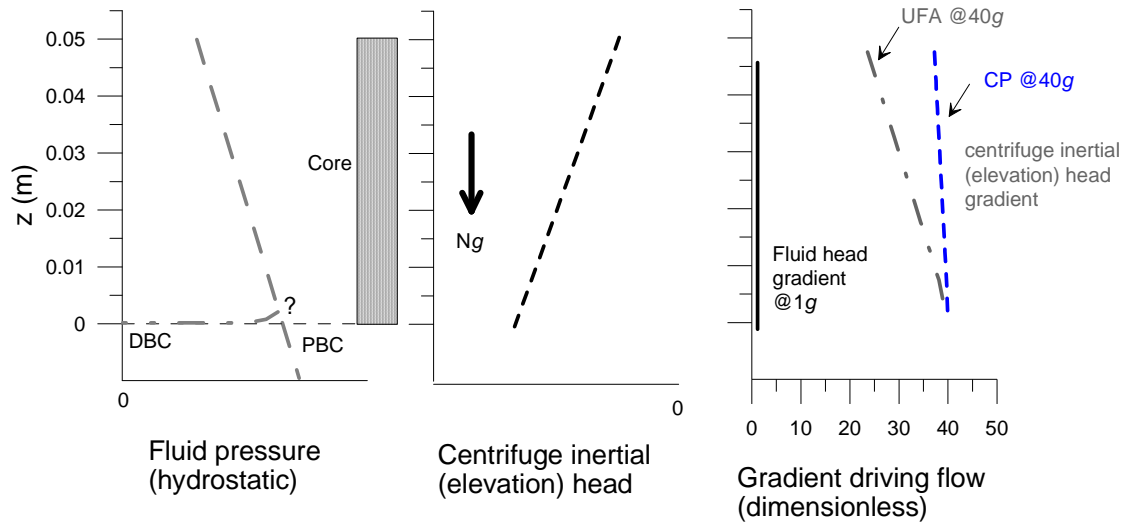

7

1 **Fig. S4.** Cross section of the (a) centrifuge permeameter and beam showing new reservoir and  
2 reference points and (b) detail of new reservoir liner with suction extraction port.

3

4 (a)

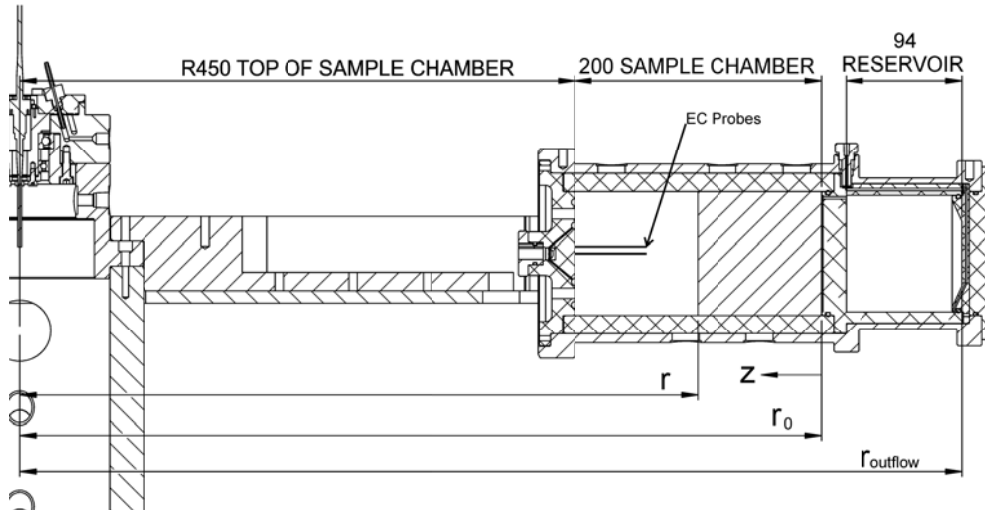

5

6

7 (b)

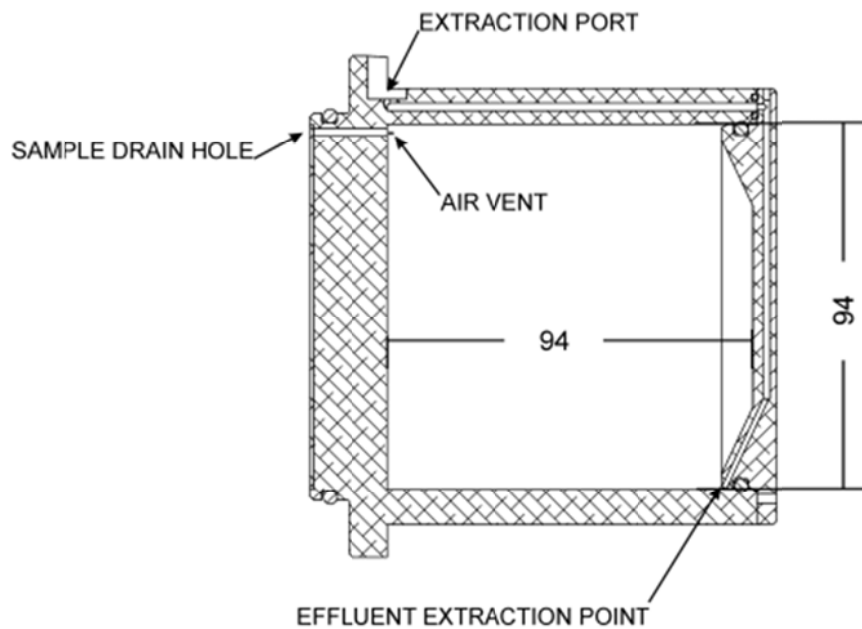

8

9
